# Supplementary material for: Determination of prostate-specific antigen (PSA) tagged with TiO2 nanoparticles using ICP-MS
Source: Royal Society of Chemistry journal article supplement (doi:10.1039/c3ja30299g), 2013-01-01
Supplement: c3ja30299g.pdf [file c3ja30299g.pdf]

## Supplementary Data.

Table1. Operating parameters of ICP-MS

| ICP-MS plasma                 | Parameters               |
|-------------------------------|--------------------------|
| <b>Instrument parameters</b>  |                          |
| Model                         | Perkin-Elmer, DRC-e, CEM |
| RF power                      | 1400W                    |
| Plasma gas flow               | 18 L min <sup>-1</sup>   |
| Auxiliary gas flow            | 1.5 L min <sup>-1</sup>  |
| Nebulizer gas flow            | 0.85 L min <sup>-1</sup> |
| <b>Acquisition parameters</b> |                          |
| Scanning mode                 | Peak Hopping             |
| Dwell time                    | 300ms                    |
| Integration mode              | Peak area                |
| Isotopes                      | <sup>49</sup> Ti         |

Fig. S1 Effect of reaction time on the signal intensity of <sup>49</sup>Ti obtained from the sandwich complex for immunoreactions between antibody tagged on the magnetic nanoparticles and PSA.

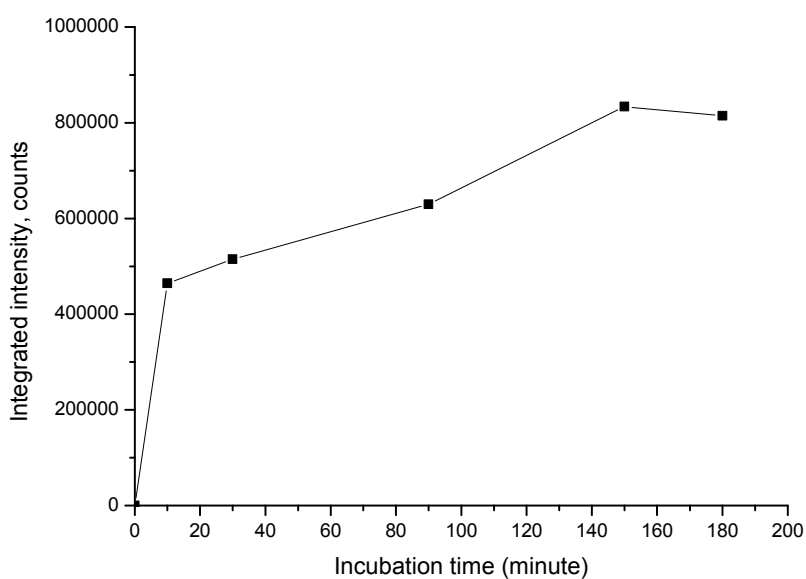

Fig. S2 The effect of reaction time on the signal intensity of  $^{49}\text{Ti}$  obtained from the sandwich complex for immunoreactions between antibody tagged on the  $\text{TiO}_2$  nanoparticles and PSA

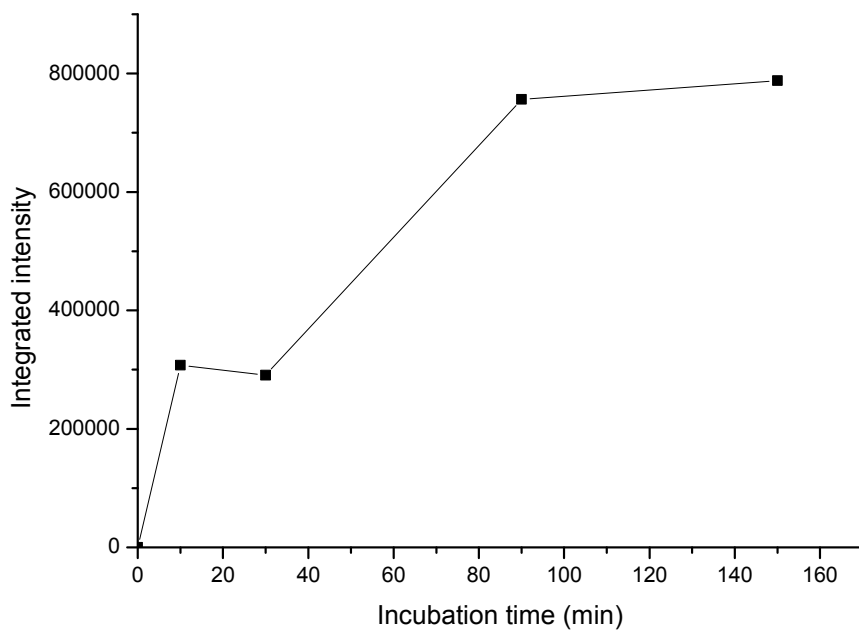

Fig. S3 The effect of elution time on the signal intensity of released Ti (eluent : 2%  $\text{HNO}_3$ )

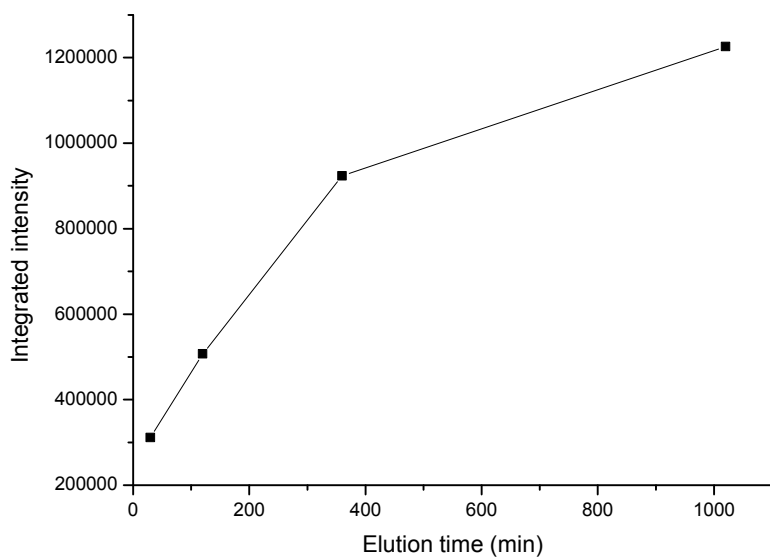

Fig. S4 Effect of BSA for reduction of nonspecific binding using Cy5 NP by LIFM

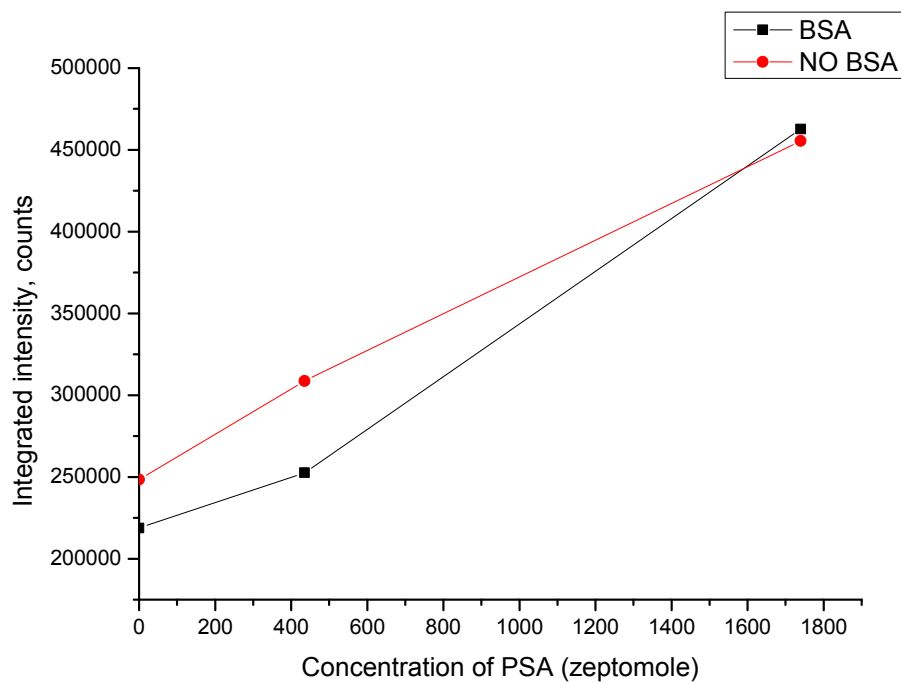

Fig. S5 Background reduction by the removal of nonspecific adsorption using sonicator using Ti NP

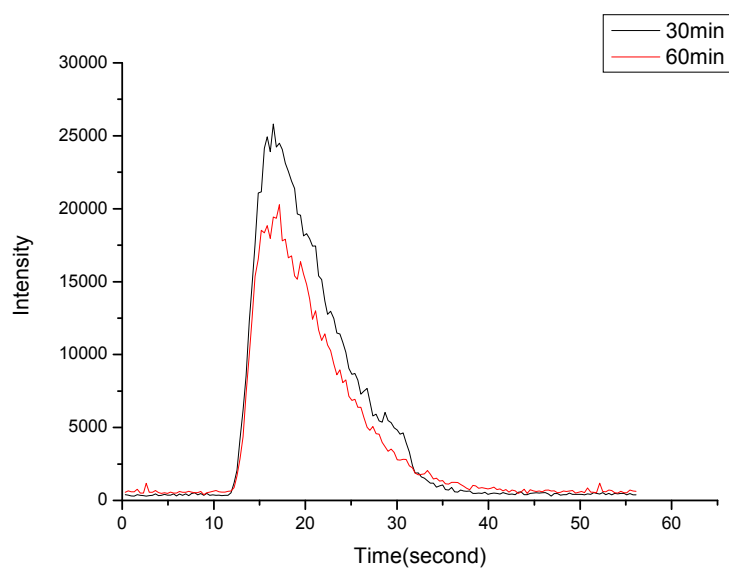

Calculation of the Limit of detection.

a. Take the log for each blank intensity (background subtracted intensity) and then, obtain standard deviation. The following table is showing the calculation of five repeated blank intensities:

| Blank intensity                | log(blank intensity) |
|--------------------------------|----------------------|
| 335179.2436                    | 5.5206               |
| 332108.4038                    | 5.5213               |
| 340747.9652                    | 5.5324               |
| 339279.2665                    | 5.5306               |
| 334635.0294                    | 5.5178               |
| Standard deviation( $\sigma$ ) | 0.006522             |

b. The limit of detection was calculated from  $3\sigma/m$ , where  $\sigma$  is standard deviation of blank and  $m$  (0.30853) is the slope of calibration curve. (The slope of calibration curve is small because Y axis is log function.)

$$\text{LOD} = (3 \times 0.006522) / 0.30853$$

Since LOD was the log of detection limit in concentration of fg/mL, we have to convert it to fg/mL unit as follows;

$$10^{((3 \times 0.006522) / 0.30853)} = 1.16 \text{ fg/mL}$$
